# Supplementary material for: Oleacein Attenuates the Pathogenesis of Experimental Autoimmune Encephalomyelitis through Both Antioxidant and Anti-Inflammatory Effects
Source: MDPI journal article supplement (doi:10.3390/antiox9111161), 2020-11-21

## Legend of Figure

### **Figure S1. Oleacein treatment modulates BV-2 microglial cells activation:**

**Quantification.** BV-2 cells were pretreated for 30 min with the indicated doses of OLE. After 4 (i) or 24 (ii) h of stimulation with 0.1  $\mu\text{g/ml}$  of LPS, COX-2, iNOS, phosho-p65-NF $\kappa$ B and NLRP3 expression was identified in cell lysates by Western blot. Quantification graphs of the Western blots are shown with fold over the control in each condition ( $^{\dagger\dagger\dagger}p<0.001$  vs control;  $^{***}p<0.001$ ,  $^{**}p<0.01$  and  $^{*}p<0.05$  vs stimuli without OLE; n= 3)

# Figure S1

i) 4 h stimulation

ii) 24 h stimulation

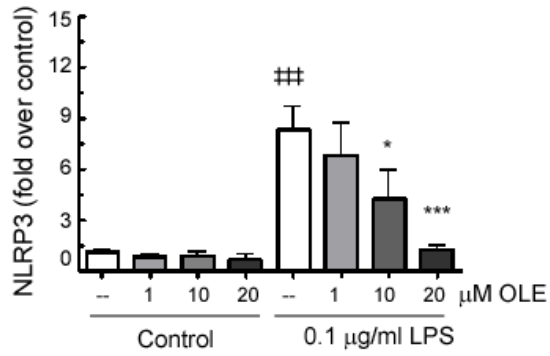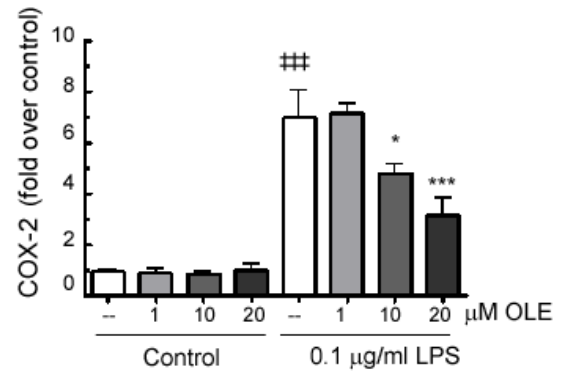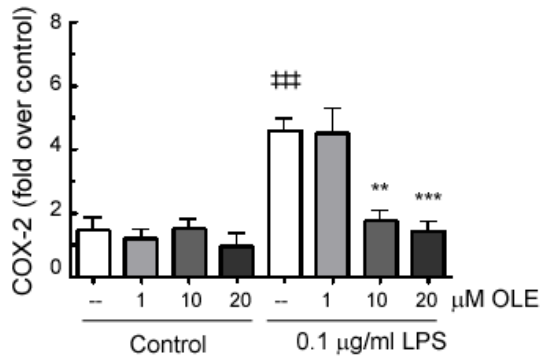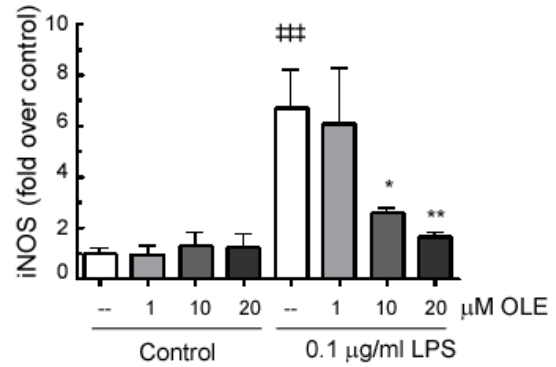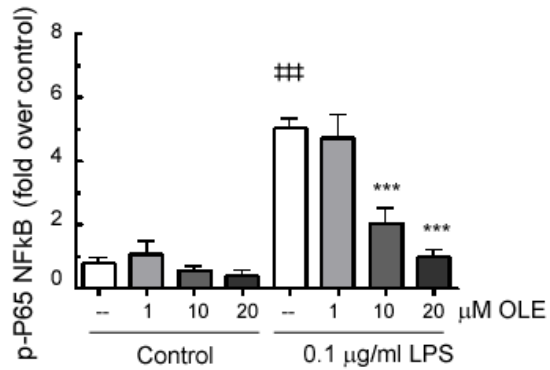

Supplement: s1 [file s1]
